# Supplementary material for: Facilitators’ perspectives on a pre-matriculation program in basic biomedical sciences for medical students: a qualitative study
Source: Research Square preprint supplement (doi:10.21203/rs.3.rs-8378558/v1), 2026-01-14
Supplement: Supplementary file 1 [file 01fe32b7892cddfd62923d0d.docx]

**00:00:00 – Speaker 1**
Alright, I will start now, ladies and gentlemen.

**00:00:03 – Speaker 2**
Do we need to introduce ourselves first or not?

**00:00:08 – Speaker 1**
No need, since we already know each other. Alright, ladies and gentlemen, we will begin with what was previously discussed by Dr. Dian April. The first topic is related to your experiences in conducting the matriculation program. But before that, let us discuss the background—why this matriculation program exists in the first place.
We would like to know and explore what the main challenges are when you provide understanding of basic biomedical materials to students. Perhaps we can start with biochemistry.

**00:01:28 – Speaker 2**
There is no different admission screening anymore, which has led to a decline in quality. Second, student motivation for matriculation. From the FGD conducted during the preparation of matriculation three years ago, students themselves stated that one of the reasons for needing matriculation was a lack of internal motivation.
Most of them do not really have personal motivation to pursue education. For example, they already come from families with clinics, so regardless of academic performance, they will still continue. As a result, their desire to study is very minimal.
In addition, their reading ability is also very poor. With minimal reading ability, understanding the material becomes very difficult. Overall, motivation is a major issue.

**00:02:56 – Speaker 3**
What is the main cause?

**00:02:57 – Speaker 2**
Well, it’s everything. That’s basically it from my perspective.

**00:03:05 – Speaker 1**
Okay, so there are two main points: motivation and discipline. Dr. Ebu SZ, do you have anything to add?

**00:03:29 – Speaker 3**
Students tend to rely on only one source. They use just one reference and do not want to compare it with other literature. When they feel they already have an answer, they stop exploring further.
When we try to challenge them, some feel uncomfortable, as if they are being attacked. They are not used to being questioned or challenged intellectually.

**00:04:37 – Speaker 3**
Another challenge is maintaining student enthusiasm. At first, they may seem interested, but in subsequent lectures their motivation declines.
Current lectures are considered too heavy: too much reading, too many assignments. The most engaging part tends to be visual explanations, such as reactions and processes. We have to find creative ways to link concepts so they can understand the underlying principles.

**00:05:19 – Speaker 3**
Dr. S3, would you like to share next? Sorry, we only have about nine minutes left.

**00:05:55 – Speaker 4**
When we try to explain concepts slowly and step by step, students still struggle to grasp them. Even when the explanation is simplified, comprehension remains low.

**00:06:28 – Speaker 2**
Their capacities vary greatly. Many struggle to organize concepts mentally. Even when they can write things down, they cannot explain them verbally. They can copy notes, but they do not truly understand what they have written.

**00:07:08 – Speaker 1**
Another issue is the lack of motivation, which affects how seriously they engage with the material.

**00:07:53 – Speaker 2**
There are also no clear consequences if students fail to meet expectations, so accountability is weak.

**00:08:10 – Speaker 4**
Most materials are simply shared via Google Drive.

**00:08:13 – Speaker 2**
When exam results are perceived as unfair, students become disappointed. They expect certain outcomes from their learning process. There is still a lack of consistency and clarity from the beginning.

**00:08:48 – Speaker 4**
Some students eventually fail to adapt.

**00:09:02 – Speaker 1**
Alright, that is what we can summarize so far.

**00:09:05 – Speaker 2**
I think that’s all from me.

**00:09:06 – Speaker 1**
Thank you to everyone for sharing these challenges and insights.

**00:09:23 – Speaker 2**
Assalamu’alaikum, Ms. Juni. Indeed, dealing with this generation requires extra enthusiasm. Even as a Javanese myself, I sometimes feel overwhelmed by this generation. However, we must find ways to bridge the gap between us and them, so that we can design learning modifications that suit their needs.
What I observe is that students are actually seeking inspiration. Unfortunately, with the widespread availability of AI, they assume everything can be obtained instantly. They even input SGD questions into AI and simply copy the answers.
As a result, their critical thinking skills are not being developed. They trust the AI output blindly and do not validate the information. This validation skill is essential for future clinicians, yet it is largely absent. When we ask them to explain their answers, they often cannot.

**00:10:54 – Speaker 2**
In the module, especially in the early histology-related modules, many students assume that the material is the same as what they learned in high school. For example, they think epithelium is just epithelium—nothing new.
This becomes a challenge for us as educators, particularly in physiology, to help them realize why this knowledge is essential and how it relates to clinical practice. Unfortunately, their attention span is short, and prolonged explanations often fail to engage them.

**00:12:00 – Speaker 2**
Another challenge is their reluctance to read textbooks. Previous generations may not have enjoyed reading textbooks either, but the current situation is worse. We need to find a learning model that encourages them to verify information properly.
Many students do not even question whether the information they read—or obtain from AI—is correct. They appear complacent and passive. This is worrying because a lack of awareness and responsibility could lead to serious consequences in clinical settings, where human lives are involved.

**00:14:39 – Speaker 5**
The main challenge, in my opinion, is literacy skills. I once asked students with GPAs above 3.2 whether they had ever finished reading an entire book in their lifetime.
The answers were shocking—most of them said they never had. Fiction or comics might be read, but textbooks or non-fiction books are rarely completed. This indicates that their literacy level does not meet our expectations.

**00:15:26 – Speaker 5**
Another issue is their excessive dependence on seniors. Students tend to follow learning methods recommended by seniors without questioning their validity.
They cannot distinguish between genuinely intelligent students and those who merely appear smart. Truly intelligent students can synthesize information and explain it to others, whereas others simply memorize shallow information.

**00:16:19 – Speaker 5**
This becomes particularly concerning when imagining them in emergency or clinical situations in the future. If they cannot properly process and communicate information, patient safety may be compromised.
They do not realize why they need to read extensively, integrate multiple sources, and engage in discussion. This lack of awareness is alarming.

**00:18:26 – Speaker 4**
Thank you.

**00:18:27 – Speaker 1**
Thank you, Dr. Corrie Aman. Next, perhaps Prof. Titi from the chemistry department could share her perspective.

**00:18:43 – Speaker 6**
Helping students understand what happens in the human body is increasingly challenging. The concept of matriculation itself is actually very good and aligns with student needs.
However, we must reconsider the teaching model. Students today are often labeled as Generation 5, but in reality, their learning habits and cognitive readiness vary significantly. This requires us, as educators, to adapt our teaching strategies accordingly.

**00:19:59 – Speaker 6**
If we only rely on interaction-based teaching without proper structure, learning outcomes remain unclear. Students today are forced to absorb large amounts of information, and the burden is often overwhelming.
Therefore, we must first understand their learning model and cognitive capacity before determining appropriate teaching strategies.

**00:20:13 – Speaker 3**
Thank you, Professor.

**00:20:20 – Speaker 4**
Basically, the challenges are similar to what has already been mentioned. From what we observe, student motivation has already declined from the start. Many learning solutions that are suggested—such as relying only on PowerPoint slides or shared materials in SGD—have proven to be ineffective.
Reading literature is often perceived as burdensome. Students feel that learning should be limited to what is explicitly provided by lecturers or discussed during SGD sessions.

**00:21:30 – Speaker 4**
There are also challenges related to student backgrounds. Some students have already entered the program with limited academic preparation. For those who are already enrolled despite weak foundations, we still have to find ways to support them so they can progress.
Innovation in teaching is necessary. For example, providing concrete examples, demonstrations, and step-by-step explanations can help trigger understanding and engagement.

**00:23:46 – Speaker 1**
After hearing from the biochemistry and chemistry departments, it appears that these challenges are not limited to one discipline. Perhaps there are additional insights from the anatomy department regarding specific challenges.

**00:24:11 – Speaker 4**
One of the biggest challenges is students’ lack of genuine learning intention. This becomes apparent when they fail to connect theoretical anatomy knowledge with clinical correlations.
I have encountered students who performed poorly in anatomy during their early semesters, and this later affected their performance in pathology and other clinical subjects.

**00:25:00 – Speaker 4**
As anatomy lecturers, we are deeply concerned. We often discuss among ourselves how matriculation should be strengthened before students enter clinical clerkships.
If foundational knowledge is weak, students struggle significantly during clinical training, and this becomes evident in their performance.

**00:26:25 – Speaker 1**
Thank you, Dr. Reza. Perhaps someone else would like to add their experience.

**00:26:41 – Speaker 7**
We experimented with different teaching approaches, including reducing resources and imposing certain restrictions. The results, however, were similar.
In subjects that require logical reasoning, such as physics-related topics, students often fail to apply logical thinking effectively.

**00:27:30 – Speaker 7**
Students tend to act without fully understanding underlying mechanisms. For example, in clinical decision-making, they may jump directly to treatment without properly analyzing the problem.
This indicates that their reasoning skills are not yet well developed.

**00:29:40 – Speaker 2**
During matriculation sessions, attendance itself became an issue. Some students arrived late, others missed sessions altogether. This reflects a lack of commitment and accountability.

**00:30:14 – Speaker 1**
When students were asked to prepare presentations, there were clear differences in quality. Some put in real effort, while others contributed minimally.

**00:30:27 – Speaker 2**
This again reflects motivation levels—some students are engaged, while others merely go through the motions.

**00:30:44 – Speaker 4**
I would like to add that beyond motivation, initiative is also lacking. Many students are hesitant to take the lead or speak up during discussions.

**00:31:11 – Speaker 1**
So there is a strong sense of fear—fear of being wrong, fear of standing out.

**00:31:33 – Speaker 1**
On the positive side, when given tasks, students often ask many questions and show creativity in presentation. However, this curiosity does not always translate into deeper understanding.

**00:32:06 – Speaker 2**
They rarely ask follow-up questions or seek clarification. When asked whether they truly understand, they often respond affirmatively without being able to explain further.

**00:32:47 – Speaker 1**
So curiosity seems to be another missing component.

**00:33:12 – Speaker 10**
In research-related tasks, only one or two students usually take initiative. Others focus only on their assigned parts and do not engage holistically with the topic.
This creates imbalance in group work and limits collaborative learning.

**00:34:40 – Speaker 10**
Students tend to learn only what is directly relevant to their own tasks. If they do not understand something, there are few consequences.
A lack of clear accountability mechanisms may contribute to this behavior.

**00:35:49 – Speaker 10**
In some cases, incorrect scientific concepts are accepted without proper correction. This is concerning, especially in foundational subjects such as chemistry and biology.

**00:36:51 – Speaker 1**
Perhaps this is also related to anatomy, which is often perceived as a memorization-heavy subject. Would you agree?

**00:37:03 – Speaker 4**
Yes, but memorization alone is not the issue. The problem is that students fail to connect memorized knowledge with broader concepts and clinical relevance.

**00:38:14 – Speaker 1**
Thank you.

**00:38:17 – Speaker 1**
Mr. Pur, from the physics department, could you share the main challenges you face when teaching physics?

**00:38:36 – Speaker 8**
In my experience, the biggest challenge is communication. Not all students who nod during lectures actually understand the material. Some truly understand, while others simply say “yes” without comprehension.
In physics-related courses, students struggle because they do not see how mathematics and physics are relevant to real life or clinical practice.

**00:39:30 – Speaker 8**
There is also a wide gap in student abilities. Some students are very strong, while others are far behind. This gap becomes more pronounced in subjects that require logical reasoning.
Grouping students strategically might help, so that weaker students are not left behind and stronger students remain challenged.

**00:40:48 – Speaker 1**
So the learning gap itself becomes a significant challenge.

**00:40:59 – Speaker 10**
From my perspective, teaching is also affected by generational and cultural differences between lecturers and students.
Students today are more resistant to authority and less receptive to traditional teaching approaches. This makes it harder to instill discipline and academic culture.

**00:42:10 – Speaker 10**
We may need to consciously create an academic culture that encourages responsibility and accountability.
Clear rules and consequences could help motivate students and foster better learning habits.

**00:43:59 – Speaker 1**
So in physics, the challenge is largely motivational as well—students who are motivated tend to be more active.

**00:45:05 – Speaker 10**
Exactly. If students are motivated, they are more willing to engage and apply logical thinking. Without motivation, even simple concepts become difficult to teach.

**00:45:34 – Speaker 6**
It is indeed difficult to attract their interest; maintaining engagement itself is a challenge.

**00:45:43 – Speaker 1**
Richard, would you like to add something from the histology perspective?

**00:46:08 – Speaker 4**
In teaching matriculation, students are expected to follow learning objectives closely. However, many students study beyond the stated learning objectives without truly understanding what they are writing.
For example, a topic may consist of 25 pages, while the learning objectives only cover 10 pages, yet students study everything superficially without grasping the core concepts.

**00:47:26 – Speaker 4**
We allow students to use any note-taking method they prefer. However, starting in 2024, we standardized the method, and compliance improved.
Despite this, students still struggle to adhere to learning objectives.

**00:47:44 – Speaker 4**
Literacy remains a major issue. When students present slides, they often cannot explain what they themselves have written.
Sometimes, they cannot even interpret specific terms used in their own slides.

**00:48:28 – Speaker 4**
When asked about motivation, most students cite external motivation rather than internal drive.
They are task-oriented and require constant guidance. If supervision is reduced, tasks are often left incomplete.

**00:48:55 – Speaker 4**
Their answers to questions often resemble AI-generated responses—brief, direct, but lacking depth.
Their ability to construct coherent explanations needs significant improvement.

**00:49:09 – Speaker 4**
AI can be a useful tool, but only if students understand how to use prompts correctly and critically evaluate the output.

**00:49:21 – Speaker 1**
Thank you.

**00:49:25 – Speaker 1**
I would like to return to a point raised earlier. Some students mentioned that reading textbooks feels overwhelming because they believe it consumes too much time.
Do we know what activities or priorities make them feel that studying is less important than other commitments?

**00:49:53 – Speaker 4**
From what I observe, some students struggle to manage their time, especially those with personal or family responsibilities.
They often believe that effective studying requires extremely long hours, which discourages them from even starting.

**00:50:00 – Speaker 4**
Many students rely heavily on PowerPoint slides and SGD discussions, repeatedly cycling through the same materials without deeper exploration.
They tend to study reactively rather than proactively.

**00:51:10 – Speaker 1**
So personal priorities and lack of structure play a role.

**00:51:22 – Speaker 4**
Yes, discipline and commitment are major issues. Some students are not accustomed to maintaining consistent study habits.
Quality of life and personal well-being also influence their academic engagement.

**00:52:58 – Speaker 3**
That becomes a serious concern.

**00:53:46 – Speaker 1**
Moving on to the next question: during your experience accompanying SGD sessions or similar activities, which basic biomedical subjects do students struggle with the most?

**00:54:21 – Speaker 2**
I’ll start. Overall, students struggle across many areas, but especially in basic biomedical sciences.

**00:54:50 – Speaker 3**
From my experience, students show varying levels of difficulty depending on the module.
In cell biology and tissue-related modules, performance varies widely, but many students lack strong foundational understanding.

**00:55:40 – Speaker 3**
They may answer questions correctly, but often their understanding is superficial.
When asked to explain mechanisms or apply concepts, they struggle significantly.

**00:56:30 – Speaker 3**
Basic structural concepts—such as molecular interactions and cellular structures—are particularly weak.
Students rely heavily on memorization rather than investigation and conceptual understanding.

**00:57:30 – Speaker 1**
So students tend to memorize rather than integrate knowledge, especially when clinical relevance is not immediately apparent.

**00:57:39 – Speaker 2**
From my experience teaching across semesters, this pattern is consistent.
Students perform better once material is connected to clinical contexts, but struggle significantly in early semesters.

**00:58:53 – Speaker 1**
Are there specific biomedical disciplines that are particularly weak?

**00:59:11 – Speaker 2**
Anatomy, physics, and biology are among the weakest.
Students often lack the foundational knowledge needed to apply these subjects clinically.

**00:59:41 – Speaker 2**
In pathology and surgical pathology, only a small number of students can explain concepts fluently without relying on memorized notes.

**01:00:27 – Speaker 1**
So logical reasoning must be developed first before clinical application can be effective.

**01:00:41 – Speaker 2**
In my view, the difficulty lies in connecting basic knowledge to clinical skills.
For example, when students are asked to perform basic examinations, such as head and neck assessments, they often fail to identify anatomical landmarks correctly.

**01:02:04 – Speaker 1**
So this is primarily an anatomy-related issue.

**01:02:08 – Speaker 2**
Yes, anatomy is the most prominent problem overall.

**01:02:16 – Speaker 4**
Is that so?

**01:02:24 – Speaker 6**
Thank you for listening to us.

**01:02:36 – Speaker 2**
Thank you.

**01:02:48 – Speaker 9**
Thank you.

**01:02:49 – Speaker 6**
Before moving on, I would like to emphasize chemistry-related foundations.
When discussing chemical reactions, students often do not understand basic electronic configurations or valence electrons.
Without this foundational knowledge, it becomes impossible to understand chemical bonding and reactions.

**01:03:30 – Speaker 6**
These topics were already taught in high school, but many students have forgotten them.
Chemistry requires both memorization and conceptual understanding. Without recalling basic concepts, advanced topics cannot be mastered.

**01:04:42 – Speaker 6**
Students need triggers or reminders to reactivate this prior knowledge.
Once reminded, some students can reconnect with the material, but many struggle.

**01:05:23 – Speaker 4**
In addition, foundational understanding is critical for biochemistry and physiology.
If students do not grasp basic processes such as respiration and metabolism, they cannot understand higher-level concepts.

**01:06:36 – Speaker 4**
Even when concepts are explained repeatedly and linked to real-life processes in the body, many students still struggle.
This suggests a lack of deep learning and intrinsic motivation.

**01:07:56 – Speaker 1**
So even after extensive explanation, motivation remains an issue.

**01:08:02 – Speaker 4**
Yes, and when improvement requires additional effort, many students are reluctant to push themselves further.

**01:08:36 – Speaker 2**
Some students believe that chemistry is manageable, but only at a superficial level.
When dealing with truly fundamental concepts, their understanding remains weak.

**01:08:43 – Speaker 1**
So challenges persist even at the most basic level.-

**01:08:48 – Speaker 8**
I have often wondered about this issue. It seems that students struggle because of their overall academic readiness.
Many problems stem from habits formed earlier, including copying and pasting previous work without true understanding.

**01:09:48 – Speaker 8**
Another issue is inconsistency among tutors. Different tutors apply different standards, which confuses students.
As a result, students adapt superficially rather than developing stable learning strategies.

**01:10:54 – Speaker 1**
Does anyone else want to add to this, beyond what has already been said regarding physiology and anatomy?

**01:11:38 – Speaker 4**
For histology, students may still manage basic identification tasks.
However, once they are required to explain pathological mechanisms, their understanding quickly breaks down.

**01:12:20 – Speaker 1**
So histology is not entirely weak, but difficulties emerge at higher cognitive levels.

**01:12:55 – Speaker 2**
That’s correct.

**01:13:11 – Speaker 5**
In histology, students can identify structures such as nerves or blood vessels.
But when asked to relate these structures to mechanisms or clinical relevance, they struggle.

**01:13:55 – Speaker 5**
Many students also fail to see why material from earlier semesters is still relevant in later modules.
They lack long-term learning orientation.

**01:15:10 – Speaker 3**
From yearly data comparisons, biology and physiology consistently show lower performance compared to other subjects.
In the 2024 cohort, some students scored as low as 25–30% in these areas.

**01:16:04 – Speaker 3**
This indicates that foundational biomedical knowledge remains weak and needs systematic reinforcement.

**01:18:31 – Speaker 2**
Regarding the effectiveness of matriculation, its success depends heavily on the model used and available resources.
Over the past three years, the matriculation format has changed multiple times, with varying outcomes.

**01:19:53 – Speaker 2**
While matriculation requires significant effort from instructors, students themselves often do not fully engage.
This imbalance can be discouraging for educators.

**01:19:59 – Speaker 4**
Sometimes it feels disheartening when instructors invest so much effort but student engagement remains minimal.

**01:20:13 – Speaker 2**
Nevertheless, compared to previous years, current student input quality appears lower, making matriculation even more necessary.

**01:21:00 – Speaker 2**
Perhaps the focus of matriculation should shift—not only toward content knowledge, but toward teaching students *how to learn*: how to read, how to manage time, how to study effectively, and how to engage in discussion.

**01:21:45 – Speaker 1**
Thank you. Any final thoughts?

**01:22:17 – Speaker 2**
Differences in high school curricula also play a role.
Not all students receive the same foundational material before entering university.

**01:23:43 – Speaker 3**
This disparity becomes a major issue, as students enter higher education with unequal preparation.

**01:24:12 – Speaker 1**
Alright, thank you, everyone, for your valuable input and reflections.
